# Supplementary material
Source: MDPI journal article supplement (https://www.mdpi.com/2504-446X/7/9/546)
Supplement: s1 [file s1]

**Table S1.** Summary of investigated lakes and reservoirs in Lithuania. Descriptive statistics of in situ-measured SD, chlorophyll-a, CDOM and turbidity.

| Location           | Date       | Secchi disk depth, m | CDOM m <sup>-1</sup> | Chl-a, µg l <sup>-1</sup> | Turbidity, NTU |
|--------------------|------------|----------------------|----------------------|---------------------------|----------------|
| Germantas lake     | 2021-09-11 | 4.00                 | 2.06                 | 7.40                      | 0.96           |
| Mastis lake        | 2021-09-11 | 0.50                 | 1.62                 | 47.11                     | 16.90          |
| Kašučių lake       | 2021-09-20 | 4.30                 | 0.91                 | 4.03                      | 0.46           |
| Padvarių reservoir | 2021-09-20 | 1.10                 | 2.00                 | 20.23                     | 9.88           |
| Prūsalių reservoir | 2021-09-20 | 2.20                 | 1.53                 | 7.86                      | 1.63           |
| Tūbausių reservoir | 2021-09-20 | 1.50                 | 3.15                 | 26.91                     | 4.78           |
| Balsys lake        | 2021-09-26 | 4.70                 | 0.37                 | 4.61                      | 1.33           |
| Gineitiškių lake   | 2021-09-26 | 0.60                 | 1.16                 | 59.73                     | 24.98          |
| Grabuostas lake    | 2021-09-26 | 1.20                 | 1.25                 | 15.34                     | 1.62           |
| Rėkyvos lake       | 2021-09-27 | 0.30                 | 2.21                 | 77.30                     | 8.54           |
| Dievytis lake      | 2022-04-13 | 1.20                 | 2.07                 | 36.34                     | 2.56           |
| Germantas lake     | 2022-04-13 | 2.70                 | 0.80                 | 2.95                      | 0.45           |
| Ilgis lake         | 2022-04-13 | 0.30                 | 20.01                | 35.02                     | 2.09           |
| Mastis lake        | 2022-04-13 | 1.50                 | 2.05                 | 18.61                     | 3.32           |
| Salotas lake       | 2022-04-13 | 1.50                 | 6.01                 | 4.86                      | 1.33           |
| Viešvėnų reservoir | 2022-04-13 | 0.90                 | 2.47                 | 14.35                     | 3.91           |
| Vembūtų reservoir  | 2022-04-13 | 1.40                 | 2.67                 | 58.50                     | 9.65           |
| Plateliai lake_1   | 2022-05-02 | 5.10                 | 0.75                 | 3.22                      | 0.04           |
| Plateliai lake_2   | 2022-05-02 | 5.30                 | 0.76                 | 2.94                      | 0.11           |
| Baltys lake        | 2022-07-27 | 0.25                 | 2.03                 | 113.23                    | 70.62          |
| Kupiškio reservoir | 2022-07-27 | 1.70                 | 3.37                 | 13.71                     | 3.43           |
| Lampėdis career    | 2022-07-27 | 2.40                 | 0.72                 | 9.04                      | 3.06           |
| Rubikių lake       | 2022-07-27 | 1.70                 | 2.29                 | 23.61                     | 3.11           |

|                       |            |      |      |       |       |
|-----------------------|------------|------|------|-------|-------|
| Vostapas lake         | 2022-07-27 | 1.80 | 3.91 | 23.61 | 1.79  |
| Linkmenas lake        | 2022-07-28 | 3.10 | 1.44 | 2.76  | 0.39  |
| Mūšėjus lake          | 2022-07-28 | 1.10 | 8.89 | 34.26 | 2.63  |
| Želvos lake_2         | 2022-07-28 | 2.25 | 3.72 | 9.95  | 1.44  |
| Želvos lake_1         | 2022-07-28 | 2.30 | 3.69 | 7.47  | 0.86  |
| Simnas lake           | 2022-08-12 | 0.35 | 2.05 | 84.93 | 26.62 |
| Stebuliškių reservoir | 2022-08-12 | 0.80 | 2.93 | 65.69 | 9.72  |
| Sujainių reservoir    | 2022-08-12 | 0.95 | 1.21 | 45.22 | 6.39  |
| Musia lake            | 2022-08-13 | 0.90 | 4.29 | 39.18 | 8.62  |
| Pakapės reservoir     | 2022-08-13 | 0.80 | 2.05 | 18.65 | 11.61 |
| Širvys lake           | 2022-08-13 | 1.50 | 5.69 | 81.43 | 10.40 |
| Žalesas lake          | 2022-08-13 | 1.25 | 7.36 | 10.88 | 3.11  |
| Ilgės lake            | 2022-08-19 | 1.00 | 2.09 | 29.66 | 3.91  |
| Kruminių reservoir    | 2022-08-19 | 1.00 | 2.70 | 20.04 | 3.46  |
| Neveiglas lake        | 2022-08-19 | 2.00 | 2.41 | 8.76  | 1.82  |
| Savistas lake         | 2022-08-19 | 1.90 | 1.62 | 8.23  | 2.59  |
| Švenčius lake         | 2022-08-19 | 0.60 | 3.08 | 21.84 | 18.16 |
| Duriai lake           | 2023-05-07 | 1.83 | 2.85 | 17.96 | 2.41  |
| Luokesų lake          | 2023-05-07 | 7.20 | 0.37 | 1.13  | 0.00  |
| Kirneilis lake        | 2023-05-07 | 3.15 | 2.21 | 5.04  | 0.19  |
